# Supplementary material
Source: PubMed Central journal article supplement (PMC11073185)
Supplement: 18_2023_4810_MOESM1_ESM.pdf [file 18_2023_4810_MOESM1_ESM.pdf]

1  
2  
3  
4  
5  
6  
7  
8  
9  
10  
11  
12  
13  
14  
15  
16  
17  
18  
19  
20  
21  
22  
23  
24  
25  
26  
27  
28

## Supplementary Materials for

### G6PD activation in TNBC cells induces macrophage recruitment and M2 polarization to promote tumor progression

*Cellular and Molecular Life Sciences*

Yin Li<sup>1</sup>, Xiao Han<sup>1</sup>, Zhoujun Lin<sup>1</sup>, Changjun Wang<sup>3†</sup>, Zhenkun Fu<sup>2†</sup>, Qiang Sun<sup>3†</sup>,  
Chenggang Li<sup>1†</sup>

†Cocorrespondence

#### Address correspondence to:

Chenggang Li Ph.D.,  
No.38 Tongyan Road, Jinnan District, Tianjin 300350, P.R. China  
E-mail: [lichenggang@nankai.edu.cn](mailto:lichenggang@nankai.edu.cn)

Zhenkun Fu Ph.D.,  
No.157 Baojian Street, Nangang District, Harbin, 150086, P.R. China.  
E-mail: [300042@hrbmu.edu.cn](mailto:300042@hrbmu.edu.cn)

Changjun Wang M.D.,  
No.1 Shuaifuyuan, Dongcheng District, Beijing, China, 100730  
Email: [wangchangjun@pumch.cn](mailto:wangchangjun@pumch.cn)

Qiang Sun M.D.,  
No.1 Shuaifuyuan, Dongcheng District, Beijing, China, 100730  
Email: [sunqiangpumch@sina.com](mailto:sunqiangpumch@sina.com)

Supplementary 1

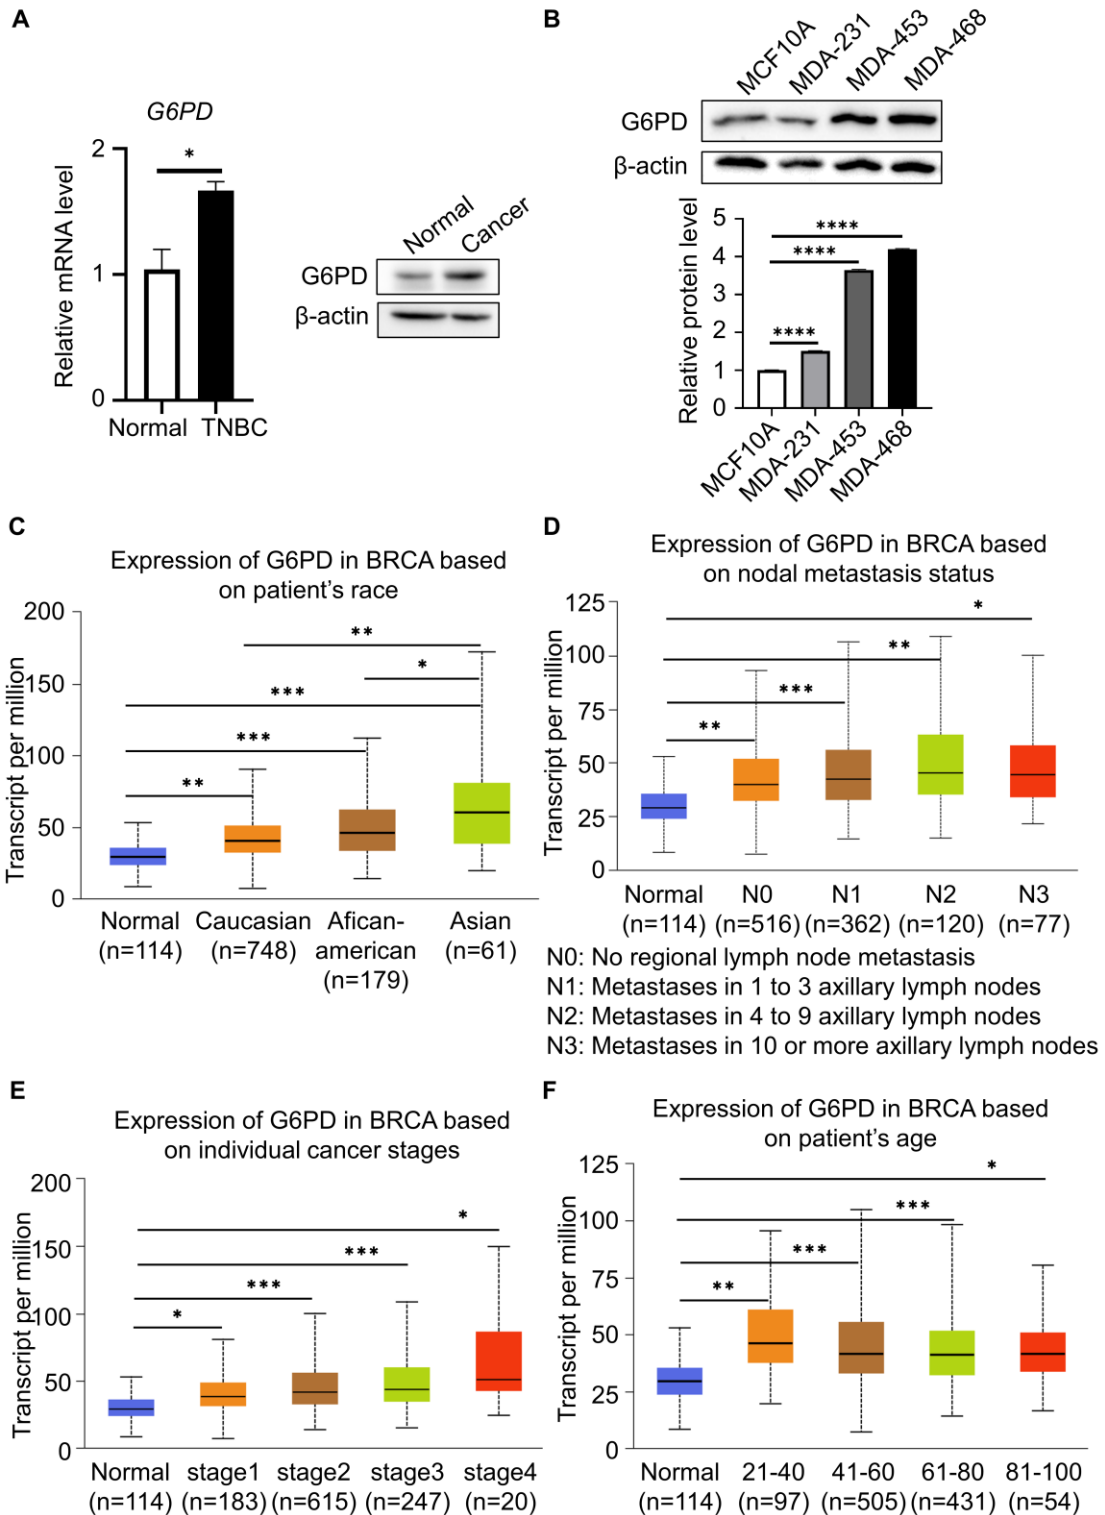

29 **Supplementary 1**

30 **(A)** G6PD expression was validated in TNBC patients by q-PCR and Western blot,  
 31 respectively. **(B)** Immunoblot analyses of G6PD in TNBC compared to MCF10A cells.  
 32 Densitometry was performed to analyze protein expression, and  $\beta$ -actin served as an  
 33 internal reference. **(C-F)** The TCGA dataset was used to analyze the association of G6PD  
 34 expression with clinical parameters from breast cancer patients. Patient's race (C), N stage

35 (D), cancer stages (E) and age (F). There were no significant differences in cancer of  
 36 different N stages, cancer stages and patient age. The P value between them was greater  
 37 than 0.5. \* $P < 0.05$ , \*\* $P < 0.01$ , \*\*\* $P < 0.001$ , \*\*\*\* $P < 0.0001$ .  
 38

### Supplementary 2

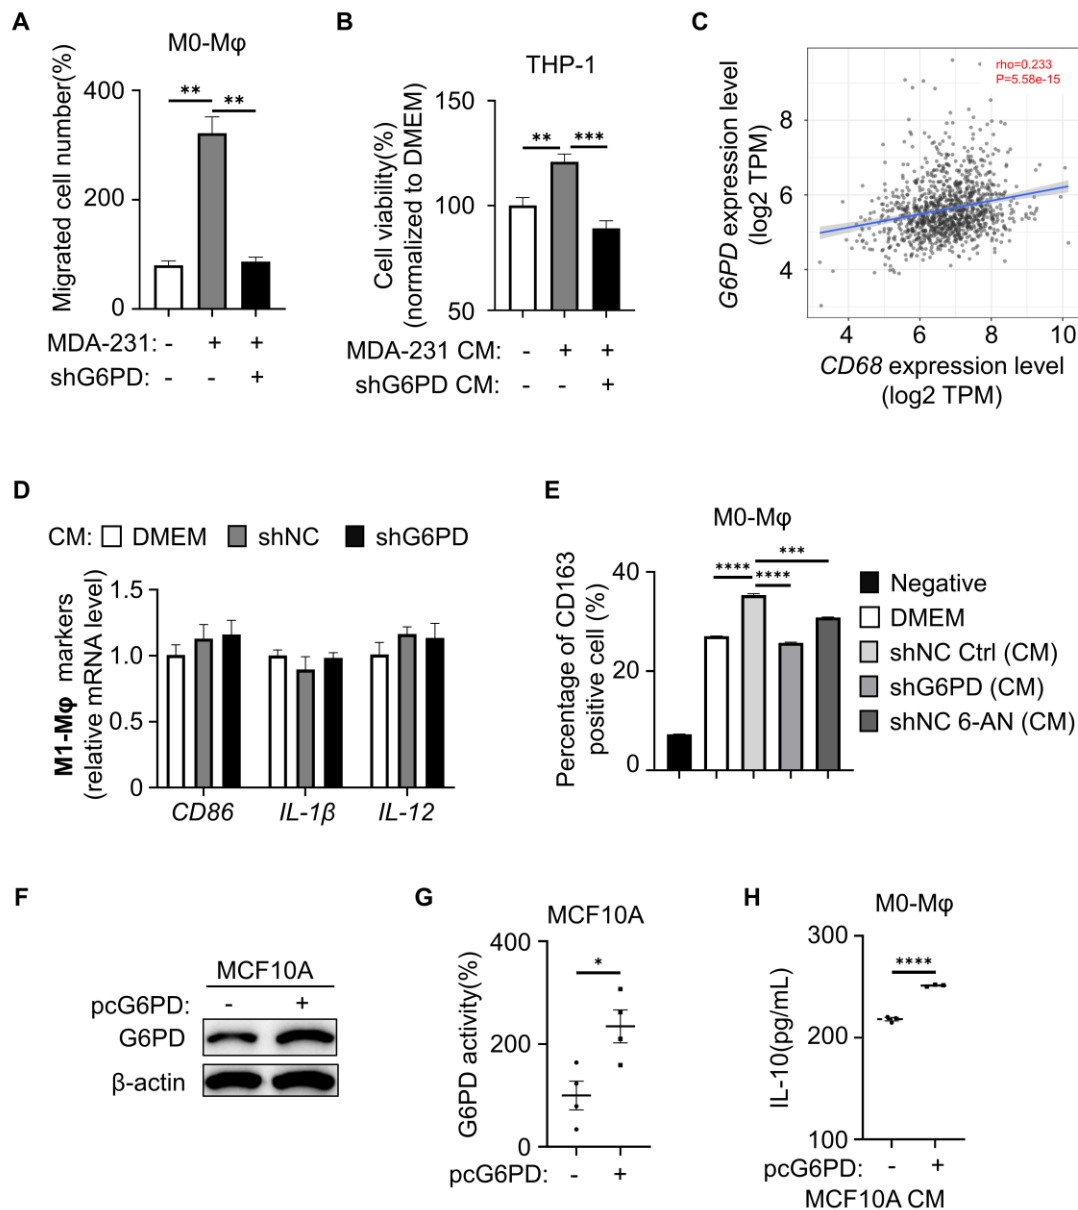

39 **Supplementary 2**  
 40 **(A)** The average numbers of migrated M0-Mφ cells were quantified. **(B)** CCK8 assays are  
 41 shown for THP-1 cells cultured in complete medium with or without CM from control or  
 42 G6PD knockdown MDA-231 cells. **(C)** Statistical analysis revealed that the expression  
 43 intensity of G6PD was positively correlated with CD68. **(D)** Levels of the M1 markers were  
 44 compared by q-PCR after M0-Mφ coculture with the specified MDA-231-CM for 6 h. **(E)**  
 45 The percentage of CD163 positive was quantified in macrophages. **(F and G)** G6PD  
 46 protein expression (F) and enzyme activity (G) in G6PD-overexpressing MCF10A cells for  
 47 24 h were increased. **(H)** IL-10 contents in the CM of macrophages cells as determined by

48 ELISA. CM was added to M0-Mφ for 6 h and replaced with serum-free culture for 6 h. The  
 49 supernatants were recovered and analyzed for IL-10 secretion. \**P* < 0.05, \*\**P* < 0.01, \*\*\**P*  
 50 < 0.001, \*\*\*\**P* < 0.0001.  
 51

### Supplementary 3

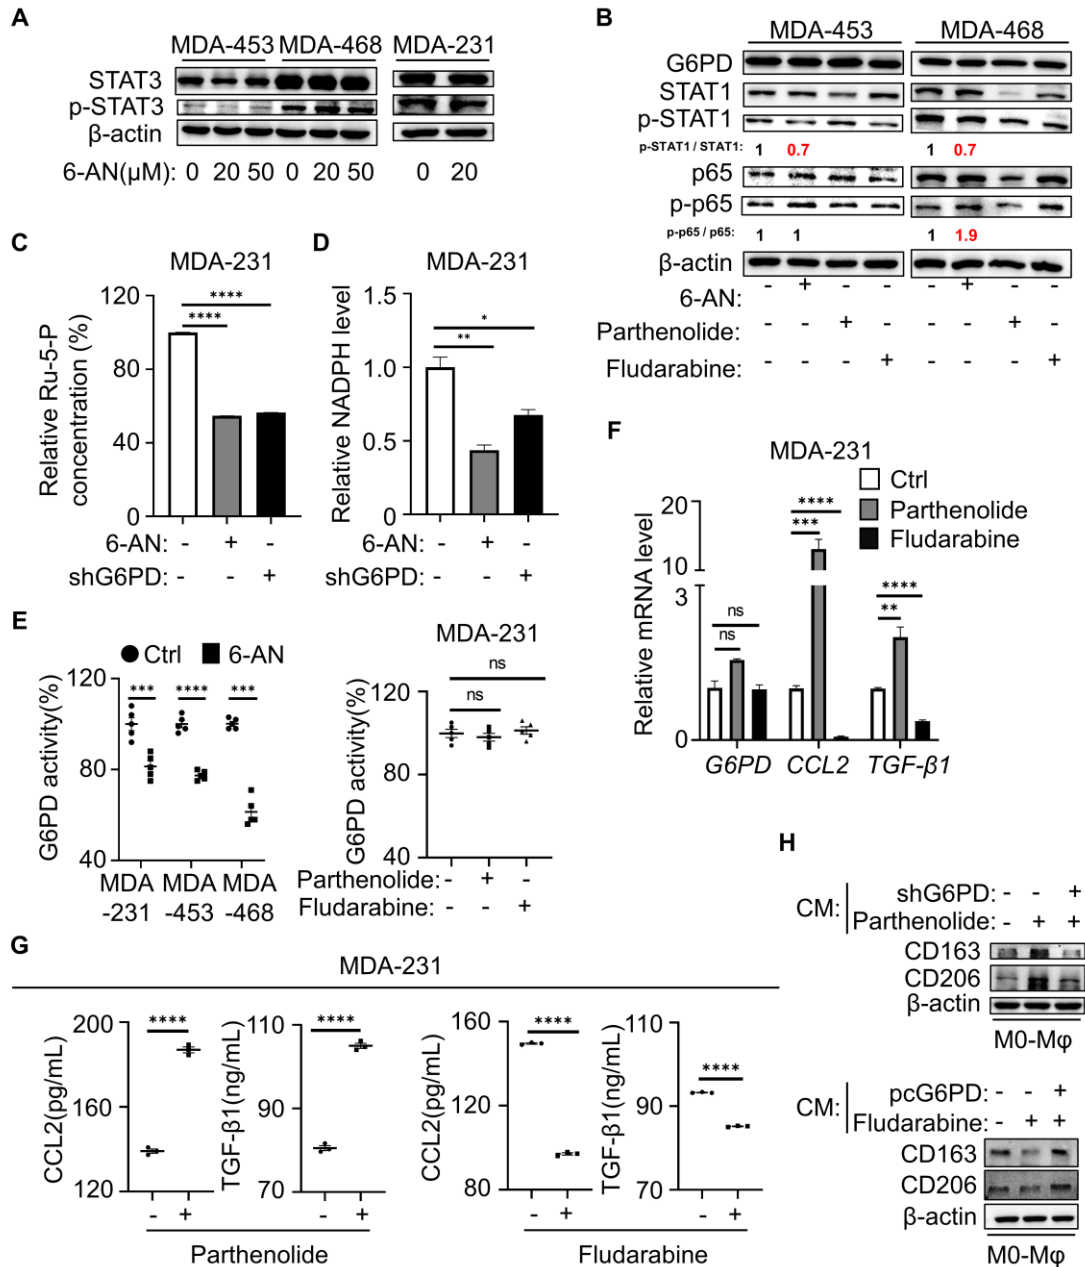

52 **Supplementary 3**  
 53 **(A)** TNBC cells were treated with 6-AN. The levels of STAT3 and phospho-STAT3 were  
 54 assessed by immunoblotting. **(B)** MDA-453 and MDA-468 cells were treated with 6-AN,  
 55 parthenolide or fludarabine. The levels of proteins were assessed by immunoblotting. **(C**  
 56 **and D)** MDA-231 cells with 6-AN or G6PD stable knockdown were tested for intracellular  
 57 level of Ru-5-P (C) and NADPH level (D). **(E)** TNBC cells were treated with 6-AN,  
 58 parthenolide or fludarabine. G6PD activity was studied using a G6PD enzyme activity

59 detection kit. **(F)** MDA-231 cells were treated with parthenolide or fludarabine for 24 h. The  
60 mRNA levels of *G6PD*, *CCL2* and *TGF-β1* were detected by q-PCR. **(G)** CCL2 and TGF-  
61 β1 contents in the CM of MDA-231 cells as determined by ELISA. Both cell lines were  
62 treated with parthenolide or fludarabine. **(H)** Immunoblot analysis of protein expression  
63 after M0-Mφ coculture with the specified MDA-231-CM for 6 h. (B-H) Cells were treated  
64 with 6-AN (20 μM for MDA-231, 50 μM for MDA-453 and MDA-468), parthenolide (10 μM)  
65 or fludarabine (1 μM). \**P* < 0.05, \*\**P* < 0.01, \*\*\**P* < 0.001, \*\*\*\**P* < 0.0001.  
66

### Supplementary 4

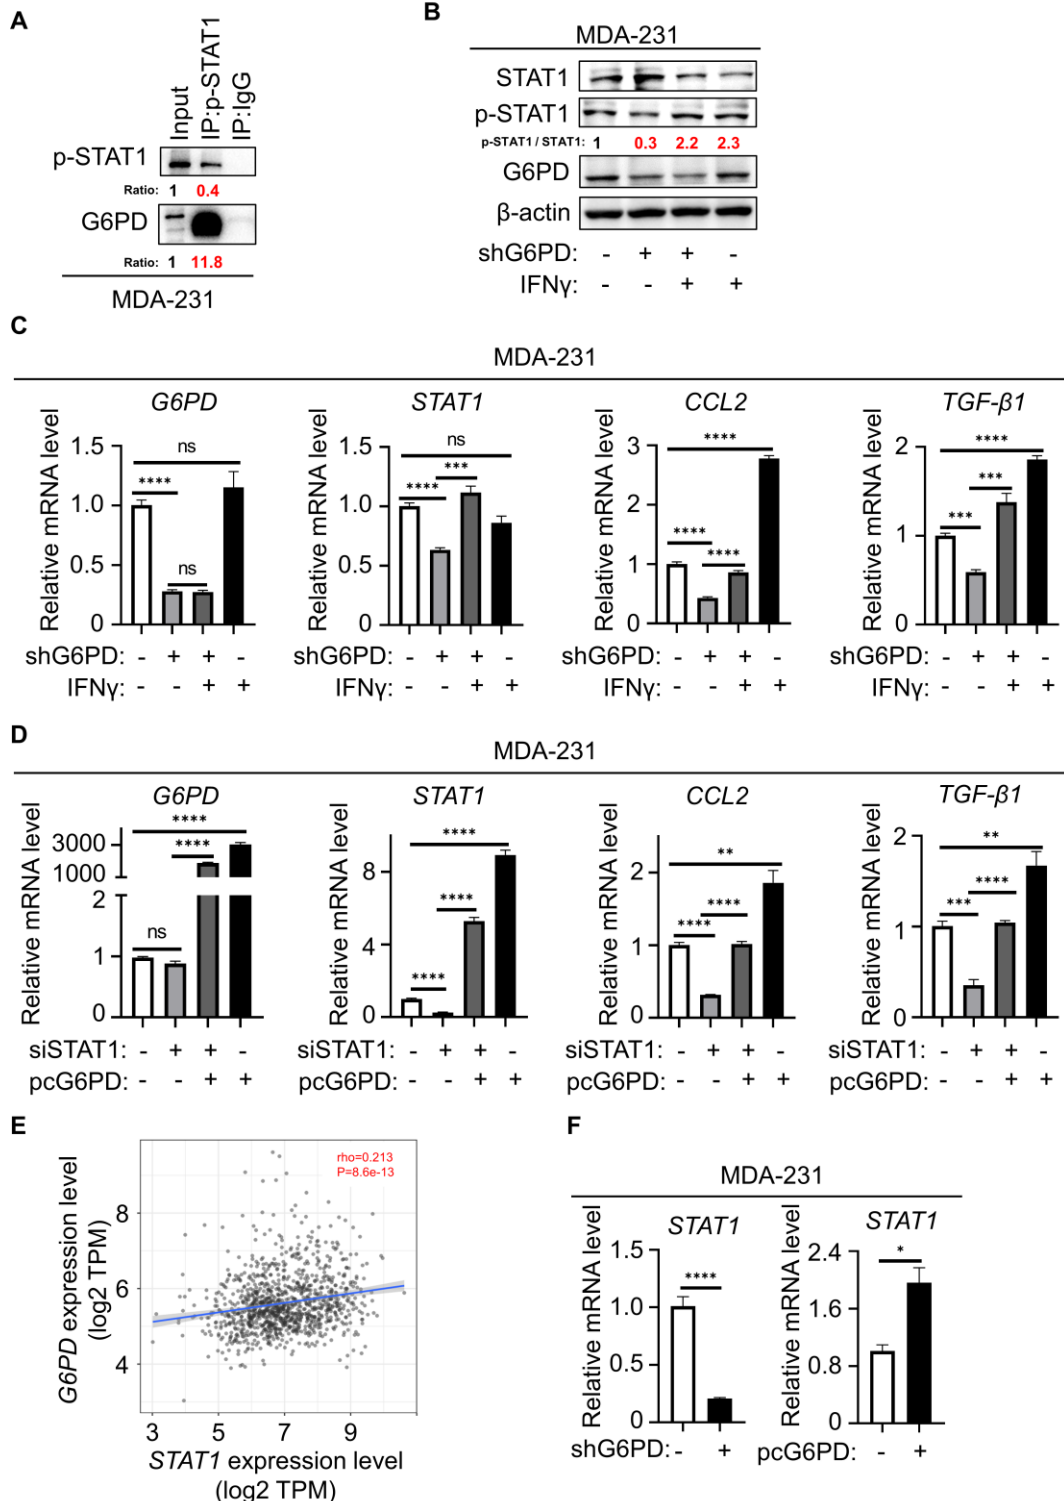

### 67 Supplementary 4

68 **(A)** MDA-231 cells were harvested and subjected to immunoprecipitation with anti-  
 69 phospho-STAT1, followed by western blot analysis with the indicated antibodies. **(B)**  
 70 Protein expression in MDA-231 cells were examined using Western blot. **(C and D)** The  
 71 mRNA levels of *G6PD*, *STAT1*, *CCL2* and *TGF-β1* in MDA-231 cells were examined using  
 72 q-PCR. **(E)** Statistical analysis revealed that the expression intensity of *G6PD* was

73 positively correlated with STAT1. (F) q-PCR analysis revealed that the expression of G6PD  
 74 was positively correlated with STAT1. (B and C) Cells were treated with IFN $\gamma$  (50 ng/mL).  
 75 \* $P$  < 0.05, \*\* $P$  < 0.01, \*\*\* $P$  < 0.001, \*\*\*\* $P$  < 0.0001.  
 76

### Supplementary 5

A

ChIP PCR of CCL2 and TGF- $\beta$ 1 promoter region designed for this study.

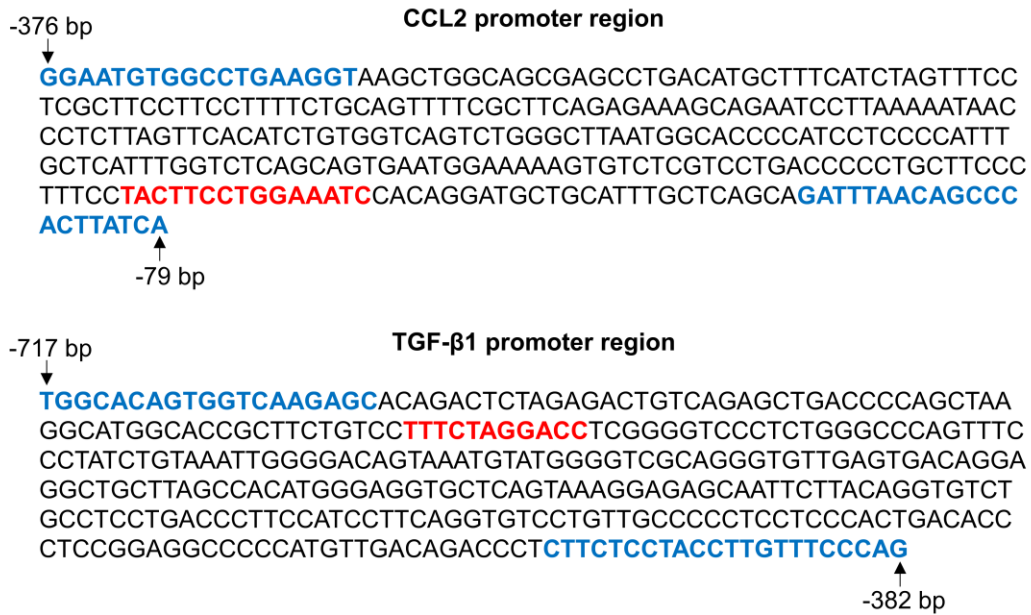

Primers for ChIP PCR, containing STAT1 motif

STAT1 predicted binding motif

B

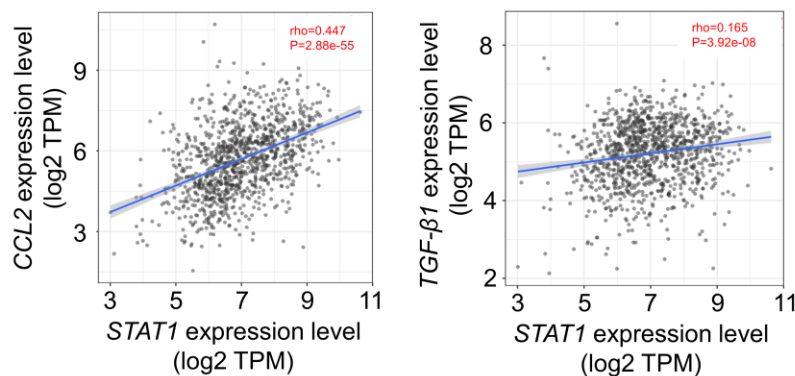

### Supplementary 5

77 (A) ChIP PCR of CCL2 or TGF- $\beta$ 1 promoter region designed for this study. The full length  
 78 of construct contained potential STAT1 predicted binding motif. (B) Statistical analysis  
 79 revealed that the expression intensity of STAT1 was positively correlated with CCL2 or  
 80 TGF- $\beta$ 1.  
 81  
 82

Supplementary 6

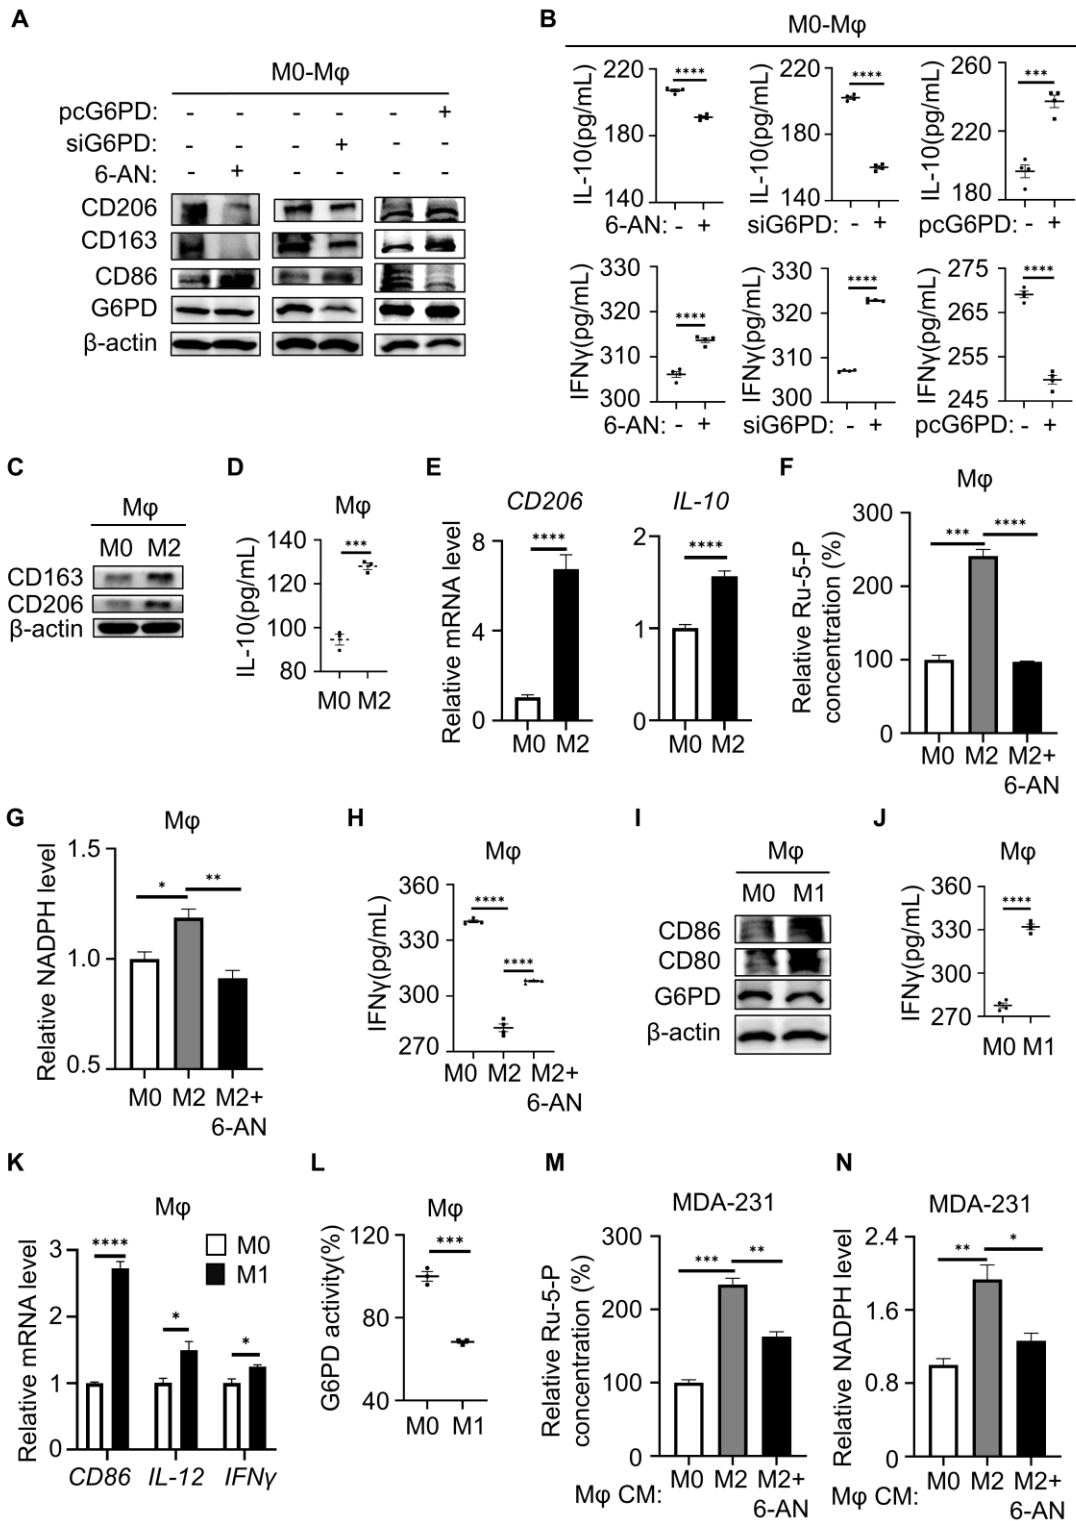

83 **Supplementary 6**  
 84 **(A)** Altered proteins in M0-Mφ treated with 6-AN/siG6PD/pcG6PD were measured by  
 85 western blotting. **(B)** ELISA detection of IFN $\gamma$  after different treatments in macrophages.  
 86 **(C)** The M2-type markers CD163 and CD206 were determined using western blotting. **(D)**  
 87 The M2-type marker IL-10 was determined using ELISA. **(E)** The M2-type markers *IL-10*



88 and *CD206* were determined using q-PCR. **(F and G)** Intracellular level of Ru-5-P (F) and  
 89 NADPH level (G) were detected in macrophages. **(H)** ELISA detection of IFN $\gamma$  after  
 90 different treatments in macrophages. **(I)** The M1-type markers *CD86*, *CD80* and *G6PD*  
 91 were determined using western blotting. **(J)** The M1-type marker IFN $\gamma$  was determined  
 92 using ELISA. **(K)** The M1-type markers *CD86*, *IL-12* and *IFN $\gamma$*  were determined using q-  
 93 PCR. **(L)** *G6PD* enzyme activity was detected in macrophages. **(M and N)** MDA-231 cells  
 94 coincubated with CM from macrophages were tested for intracellular level of Ru-5-P (M)  
 95 and NADPH level (N). \**P* < 0.05, \*\**P* < 0.01, \*\*\**P* < 0.001, \*\*\*\**P* < 0.0001.  
 96

### Supplementary 7

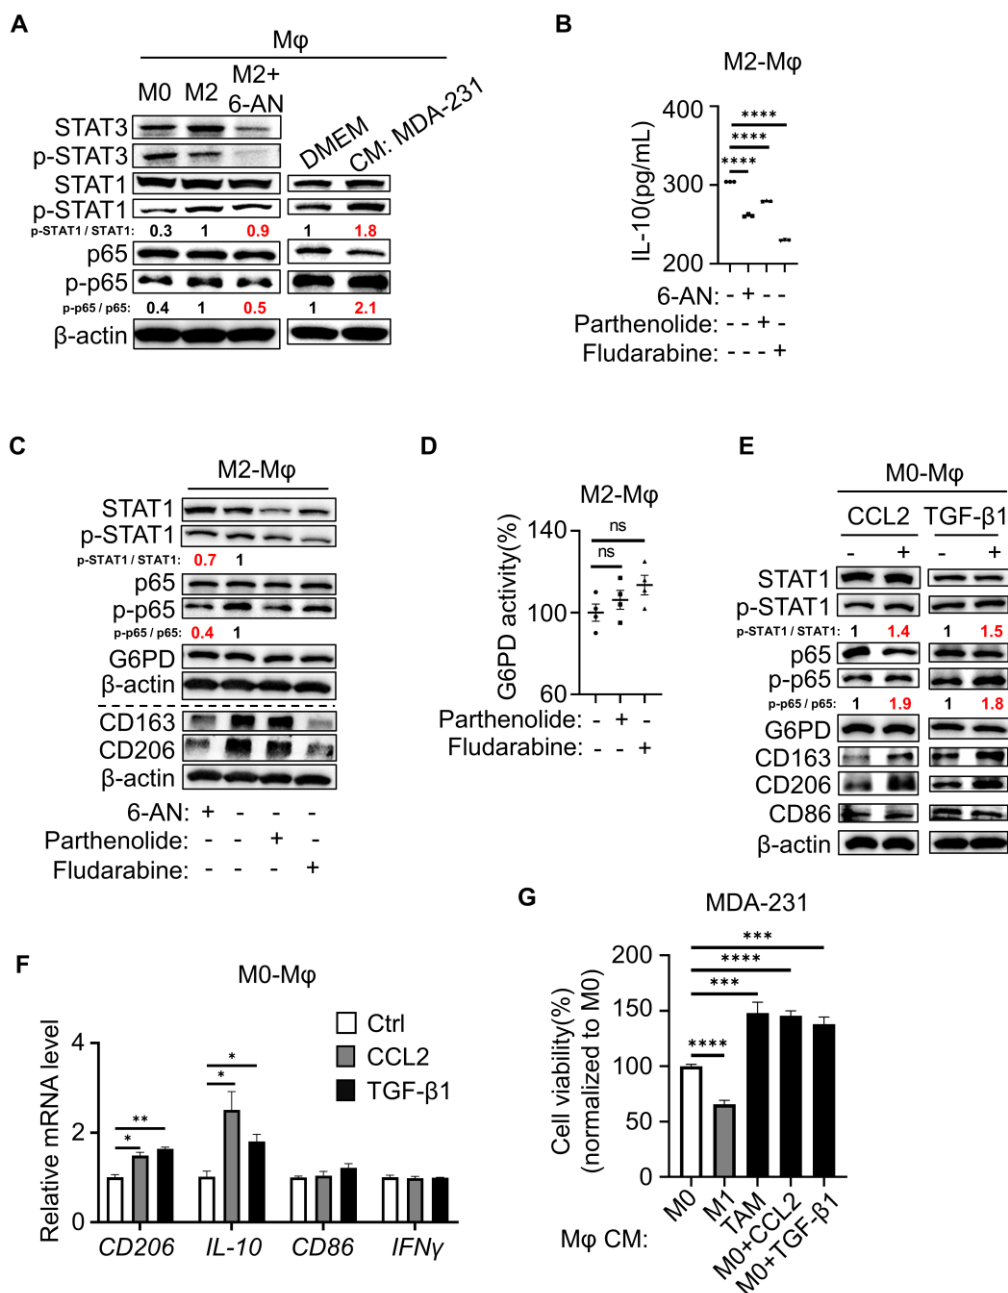

### 97 Supplementary 7

98 **(A)** Protein expression in macrophages was examined using immunoblotting. **(B)** ELISA

99 analysis of IL-10 after treating M2-M $\phi$  with 50  $\mu$ M 6-AN, 10  $\mu$ M parthenolide and 1  $\mu$ M  
100 fludarabine for 24 h. **(C)** M2-M $\phi$  were treated with 6-AN (20  $\mu$ M), parthenolide (10  $\mu$ M) or  
101 fludarabine (1  $\mu$ M). The levels of proteins were assessed by immunoblotting. **(D)** G6PD  
102 enzyme activity was detected in macrophages. **(E)** Protein level in macrophages following  
103 the addition of 30 ng/mL CCL2 or TGF- $\beta$ 1 as determined by immunoblotting. **(F)** The  
104 macrophages markers *CD206*, *IL-10*, *CD86* and *IFN $\gamma$*  were determined using q-PCR. **(G)**  
105 The cell viability of MDA-231 cells cocultured with CM from macrophages detected by MTT  
106 assay. \**P* < 0.05, \*\**P* < 0.01, \*\*\**P* < 0.001, \*\*\*\**P* < 0.0001.
